# Supplementary material for: Cyclophilin D controls mitochondrial pore–dependent Ca2+ exchange, metabolic flexibility, and propensity for heart failure in mice
Source: JCI journal article supplement (doi:10.1172/jci43171), 2010-09-30
Supplement: sd1 [file 1]

301 Moved Permanently

# Moved Permanently

The document has moved here.
